# Supplementary material for: Cargo delivery to adhering myoblast cells from liposome-containing poly(dopamine) composite coatings
Source: Royal Society of Chemistry journal article supplement (doi:10.1039/c3bm60107b), 2013-01-01
Supplement: c3bm60107b.pdf [file c3bm60107b.pdf]

## Supporting Information

### Cargo Delivery to Adhering Myoblast Cells from Liposome-Containing Poly(dopamine) Composite Coatings

Martin E. Lyngø,<sup>a</sup> Boon M. Teo,<sup>a</sup> Marie Baekgaard Laursen,<sup>a</sup> Yan Zhang,<sup>a,b</sup> and Brigitte Städler<sup>a\*</sup>

<sup>a</sup> iNANO Interdisciplinary Nanoscience Centre, Aarhus University  
Gustav Wieds Vej 14, 8000 Aarhus, Denmark

<sup>b</sup> State Key Laboratory for Modification of Chemical Fibers and Polymer Materials, College of Material Science and Engineering, Donghua University, Shanghai, People's Republic of China

Corresponding Author

E-mail: [bstadler@inano.au.dk](mailto:bstadler@inano.au.dk)

Phone: +45 8715 6668

Fax: +45 8715 4041

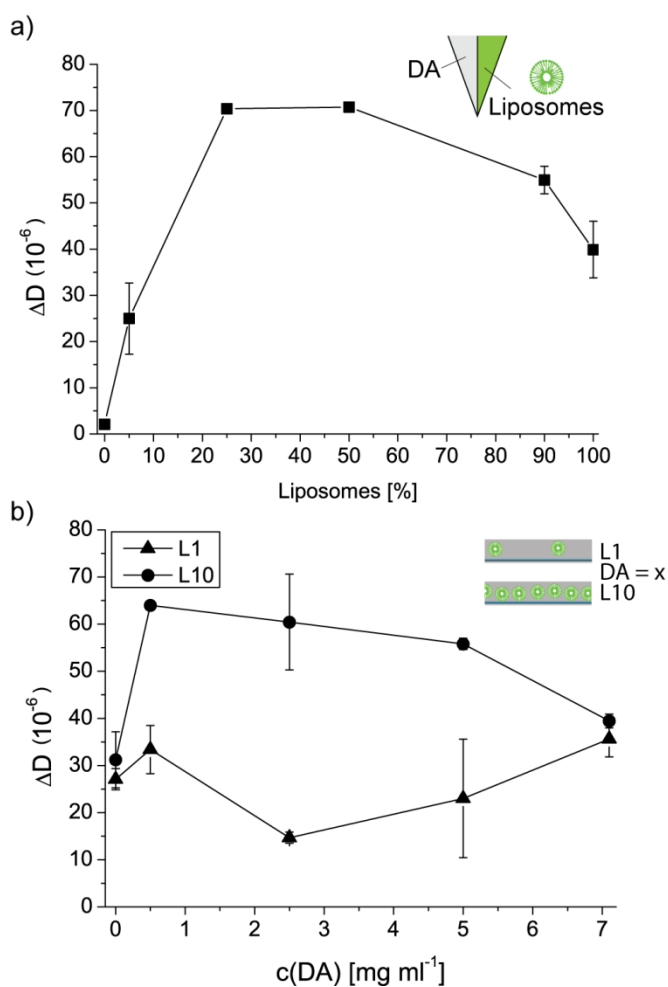

**Figure S1.** Liposome/PDA film assembly. a) Change in dissipation  $\Delta D$  of PLL pre-coated QCM crystals upon binding of different volume mixtures of DA/liposomes. b) Change in dissipation  $\Delta D$  of PLL pre-coated QCM crystals upon deposition of mixtures between L1 or L10 and different concentrations of DA.

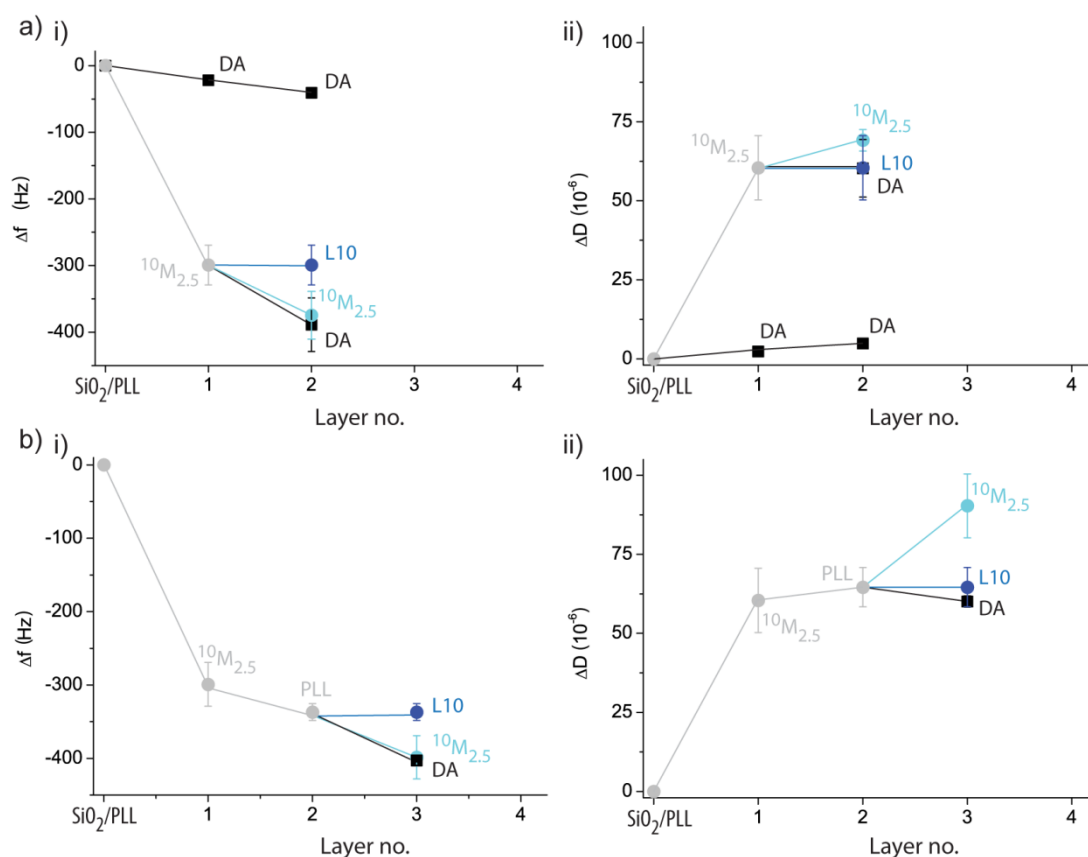

**Figure S2.** Second liposome deposition step. The change in frequency  $\Delta f$  (i) and change in dissipation  $\Delta D$  (ii) of a PLL pre-coated QCM crystal upon deposition of different coatings is shown. a)  $^{10}\text{M}_{2.5}$  deposition followed by the adsorption of DA, L10 or  $^{10}\text{M}_{2.5}$ . As comparison,  $\Delta f$  and  $\Delta D$  of a silica crystal upon deposition of multiple DA steps is plotted. The adsorption of DA to silica and  $^{10}\text{M}_{2.5}$  was found to be very similar. Further, there was no L10 adsorption observed to  $^{10}\text{M}_{2.5}$  pre-coated crystals and only a minor amount of  $^{10}\text{M}_{2.5}$  was deposited as it can be seen by the small  $\Delta f$  and  $\Delta D$ . The larger  $\Delta D$  for  $^{10}\text{M}_{2.5}$  than for DA however suggests that some liposomes were immobilized in the film. b)  $^{10}\text{M}_{2.5}$ /PLL deposition followed by the adsorption of DA, L10 or  $^{10}\text{M}_{2.5}$ .

i)  $^{10}\text{M}_{2.5}/\text{PLL}/\text{PMA}_c/^{10}\text{M}_{2.5}$

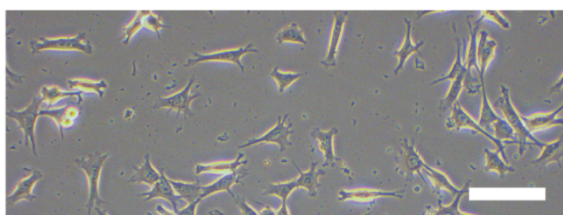

ii)  $^{10}\text{M}_{2.5}/\text{PLL}/\text{PMA}_c/\text{L10}/\text{PDA}_{30}$

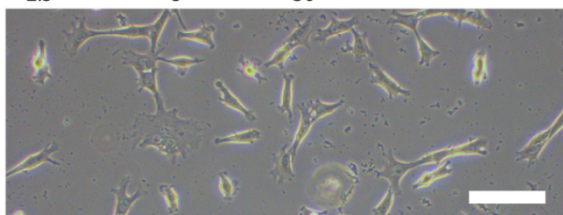

**Figure S3.** Myoblast adhesion to coatings with two liposome deposition steps. Representative microscopy images of myoblast cells allowed adhering to different coatings for 24 h: i)  $^{10}\text{M}_{2.5}/\text{PLL}/\text{PMA}_c/^{10}\text{M}_{2.5}$  and  $^{10}\text{M}_{2.5}/\text{PLL}/\text{PMA}_c/\text{L}/\text{PDA}_{30}$ . The small black aggregates were always observed on coating with  $\text{PMA}_c$  and were attributed to polymer aggregates and not contamination of the cell culture. The scale bar is 100  $\mu\text{m}$ .

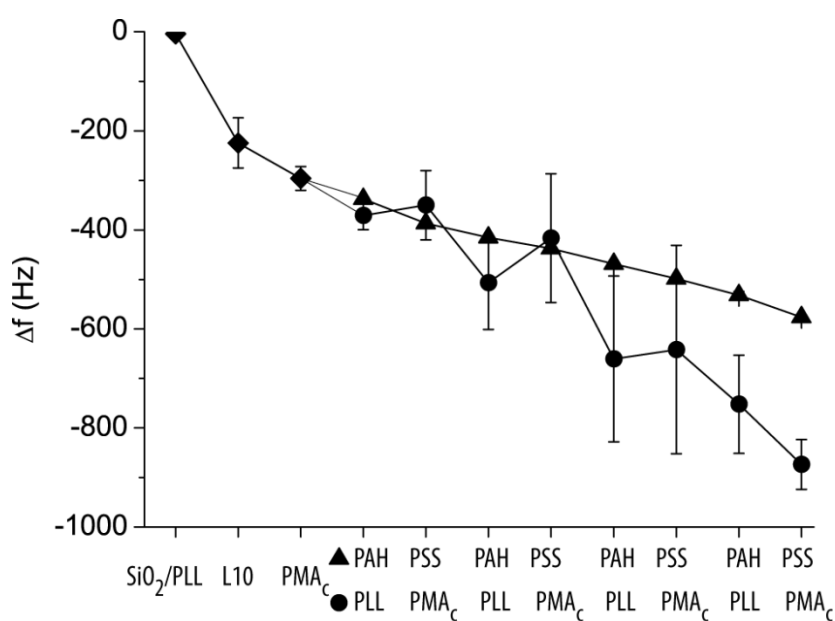

**Figure S4.** The change in frequency  $\Delta f$  of the entire film assembly is shown.

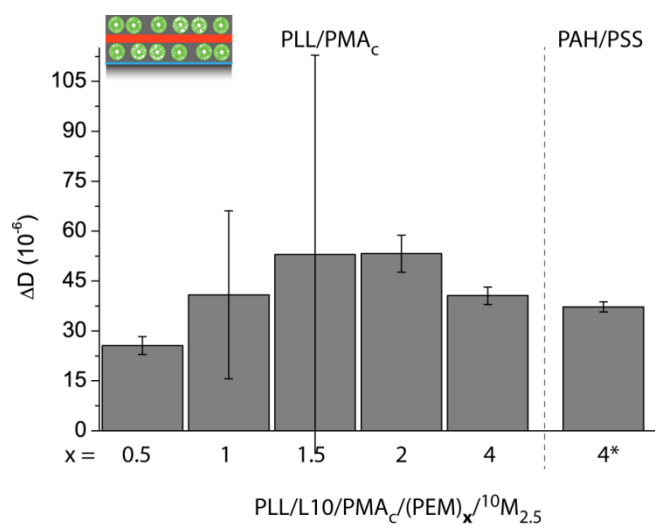

**Figure S5.** Separation layers. Change in dissipation  $\Delta D$  of PLL/L10/PMA<sub>c</sub>/(PEM)<sub>x</sub> pre-coated QCM crystals upon binding of <sup>10</sup>M<sub>2.5</sub> depending on the number (x) and type of separation layers.
